# Supplementary material
Source: PubMed Central journal article supplement (PMC2206620)
Supplement: pnas_0703015105_1.pdf [file pnas_0703015105_1.pdf]

Table 4. Estimates of Natural Forest area in 90 tropical countries<sup>1</sup>, showing different vintages of statistics in Forest Resources Assessments 1980, 1980 (1982 revision, 'FRA 1982'), 1990, 2000 and 2005 (10<sup>3</sup> ha), with totals for 122<sup>2</sup> and 132<sup>3</sup> countries included in FRA 2000 and FRA 2005 respectively

|                  | FRA1980   | FRA 1982  | FRA1990   |           | FRA2000   |           | FRA2005   |           |           |
|------------------|-----------|-----------|-----------|-----------|-----------|-----------|-----------|-----------|-----------|
|                  | 1980      | 1980      | 1980      | 1990      | 1990      | 2000      | 1990      | 2000      | 2005      |
| Africa           | 703,079   | 703,079   | 568,600   | 527,586   | 683,503   | 629,410   | 672,370   | 627,652   | 606,966   |
| Asia-Pacific     | 336,458   | 336,458   | 349,600   | 310,597   | 306,462   | 264,466   | 341,850   | 312,228   | 295,836   |
| Latin America    | 930,659   | 895,652   | 992,200   | 918,115   | 936,093   | 904,661   | 934,262   | 888,654   | 864,959   |
| Totals           | 1,970,196 | 1,935,189 | 1,910,400 | 1,756,297 | 1,926,058 | 1,798,537 | 1,948,482 | 1,828,534 | 1,767,761 |
| No. of Countries | 76        | 76        | 90        | 90        | 90        | 90        | 90        | 90        | 90        |
| Original Totals  | 1,970,196 | 1,935,189 | 1,910,400 | 1,756,297 | 1,931,385 | 1,803,560 | 1,954,609 | 1,834,265 | 1,773,283 |
| No. of Countries | 76        | 76        | 90        | 90        | 122       | 122       | 132       | 132       | 132       |
| Sources:         | 1         | 2         | 3         | 3         | 4         | 4         | 5         | 5         | 5         |

<sup>1</sup>The 90 countries are (with an asterisk indicating those excluded from the 76 country dataset):

Africa: Angola, Benin, Botswana, Burkina Faso, Burundi, Cameroon, Cape Verde\*, Central African Republic, Chad, Congo, Congo(Zaire), Djibouti\*, Equatorial Guinea, Ethiopia, Gabon, Gambia, Ghana, Guinea, Guinea-Bissau, Ivory Coast, Kenya, Liberia, Madagascar, Malawi, Mali, Mauritania\*, Mozambique, Namibia, Niger, Nigeria, Rwanda, Senegal, Sierra Leone, Somalia, Sudan, Tanzania, Togo, Uganda, Zambia, Zimbabwe

Asia: Bangladesh, Bhutan, Brunei, Burma, Cambodia, India, Indonesia, Laos, Malaysia, Nepal, Pakistan, Papua New Guinea, Philippines, Singapore\*, Sri Lanka, Thailand, Vietnam

Latin America and Caribbean: Antigua\*, Bahamas\*, Belize, Bolivia, Brazil, Colombia, Costa Rica, Cuba, Dominican Republic, Dominica\*, Ecuador, El Salvador, French Guiana, Grenada\*, Guadeloupe\*, Guatemala, Guyana, Haiti, Honduras, Jamaica, Martinique\*, Mexico, Nicaragua, Panama, Paraguay, Peru, Puerto Rico\*, Saint Kitts and Nevis\*, Saint Lucia\*, Saint Vincent\*, Suriname, Trinidad and Tobago, Venezuela

<sup>2</sup>The 32 additional countries in the 122 country dataset are:

Africa: Comoros, Mauritius, Réunion, Saint Helena, Sao Tome and Principe, Seychelles

Asia-Pacific: American Samoa, Cook Islands, Fiji, French Polynesia, Guam, Kiribati, Marshall Islands, Micronesia, Nauru, New Caledonia, Niue, Northern Mariana Islands, Palau, Samoa, Solomon Islands, Tonga, Vanuatu, Yemen

Latin America and Caribbean: Barbados, Bermuda, British Virgin Islands, Cayman Islands, Martinique, Montserrat, Netherlands Antilles, US Virgin Islands

<sup>3</sup>The 10 additional countries in the 132 country dataset are:

Africa: British Indian Ocean Territory, Mayotte

Asia-Pacific: Maldives, Pitcairn, Tokelau, Tuvalu, Wallis and Futuna Islands

Latin America and Caribbean: Anguilla, Aruba, Turks and Caicos Islands
