# Supplementary material
Source: PubMed Central journal article supplement (PMC2206620)
Supplement: pnas_0703015105_2.pdf [file pnas_0703015105_2.pdf]

Table 5. Areas of Natural Forest 1980-2005 in 12 countries with the highest areas ( $10^6$  ha), and the ratio of 2005 and 1980 areas, based on data in Forest Resources Assessments (FRAs)

|                  | FRA1980 | FRA 1990 | FRA2000 |      | FRA2005 |      |      | 2005/<br>1980 |
|------------------|---------|----------|---------|------|---------|------|------|---------------|
|                  | 1980    | 1990     | 1990    | 2000 | 1990    | 2000 | 2005 |               |
| Brazil           | 569     | 561      | 560     | 539  | 515     | 488  | 472  | 0.83          |
| Congo (Zaire)    | 178     | 113      | 141     | 135  | 141     | 135  | 134  | 0.75          |
| Indonesia        | 117     | 110      | 108     | 96   | 115     | 96   | 86   | 0.74          |
| Peru             | 71      | 68       | 68      | 65   | 70      | 69   | 68   | 0.96          |
| Bolivia          | 69      | 49       | 55      | 53   | 63      | 60   | 59   | 0.86          |
| India            | 57      | 52       | 45      | 32   | 62      | 65   | 65   | 1.14          |
| Angola           | 54      | 23       | 71      | 70   | 61      | 60   | 59   | 1.09          |
| Colombia         | 52      | 54       | 51      | 50   | 61      | 61   | 60   | 1.15          |
| Sudan            | 48      | 43       | 71      | 61   | 70      | 65   | 62   | 1.29          |
| Mexico           | 48      | 49       | 61      | 55   | 68      | 65   | 63   | 1.31          |
| Tanzania         | 42      | 34       | 40      | 39   | 41      | 37   | 35   | 0.83          |
| Papua New Guinea | 38      | 36       | 32      | 31   | 32      | 30   | 29   | 0.76          |

Sources: (1, 3-5)
