# Supplementary material
Source: PubMed Central journal article supplement (PMC2206620)
Supplement: pnas_0703015105_3.pdf [file pnas_0703015105_3.pdf]

**Table 6.** Adjustments of 33% or more to FRA 1990 estimates for Natural Forest area in 1990 (in FRA 2000) and FRA 2000 estimates for 2000 (in FRA 2005), as a proportion of the original estimate

|                     | FRA 2000 adjustment<br>to FRA1990 estimate for 1990 |              | FRA 2005 adjustment<br>to FRA2000 estimate for 2000 |
|---------------------|-----------------------------------------------------|--------------|-----------------------------------------------------|
| Kenya               | 14.05                                               | Burundi      | 4.33                                                |
| Somalia             | 9.98                                                | El Salvador  | 1.97                                                |
| Haiti               | 5.35                                                | Sierra Leone | 1.71                                                |
| Bahamas             | 3.53                                                | Ethiopia     | 1.49                                                |
| Gambia              | 3.48                                                | St. Lucia    | 1.13                                                |
| Angola              | 2.09                                                | India        | 1.05                                                |
| St. Lucia           | 1.80                                                | Puerto Rico  | 0.81                                                |
| Zimbabwe            | 1.49                                                | Kenya        | -0.80                                               |
| Rwanda              | 1.02                                                | Nicaragua    | 0.70                                                |
| Paraguay            | 0.91                                                | St. Vincent  | 0.67                                                |
| Mozambique          | 0.80                                                | Guatemala    | 0.52                                                |
| Djibouti            | -0.73                                               | Panama       | 0.50                                                |
| Trinidad and Tobago | 0.70                                                | Ivory Coast  | 0.45                                                |
| St. Kitts and Nevis | -0.69                                               | Senegal      | 0.45                                                |
| Sudan               | 0.65                                                | Zambia       | 0.43                                                |
| Burkina Faso        | 0.63                                                | Philippines  | 0.41                                                |
| Ethiopia            | -0.55                                               | Bahamas      | -0.39                                               |
| Burundi             | -0.53                                               | Malawi       | 0.38                                                |
| El Salvador         | 0.52                                                | Mozambique   | -0.36                                               |
| Singapore           | -0.50                                               | Rwanda       | 0.35                                                |
| Jamaica             | 0.50                                                | Brunei       | -0.34                                               |
| Togo                | -0.49                                               | Costa Rica   | 0.33                                                |
| Costa Rica          | 0.46                                                |              |                                                     |
| Pakistan            | 0.38                                                |              |                                                     |
| St. Vincent         | -0.36                                               |              |                                                     |
| Burma               | 0.36                                                |              |                                                     |
| Benin               | -0.33                                               |              |                                                     |

Sources: (3-5)
