# Supplementary material
Source: PubMed Central journal article supplement (PMC2206620)
Supplement: pnas_0703015105_4.pdf [file pnas_0703015105_4.pdf]

Table 7. Estimates of tropical moist forest area (10<sup>3</sup> ha) from various sources, including FAO estimates for closed broadleaved forest area ('FAOCB') and ecosystem types ('FAOE'), with alternative totals for 63 countries (65 for Sommer)<sup>1</sup>

|                | Persson<br>1973 | Sommer<br>1975 | Myers<br>1980 | Grainger<br>1980 | Myers<br>1989 |             |
|----------------|-----------------|----------------|---------------|------------------|---------------|-------------|
| Africa         | 182,695         | 175,000        | 155,668       | 204,622          | 152,200       |             |
| Asia-Pacific   | 248,929         | 254,000        | 290,408       | 263,647          | 210,600       |             |
| Latin America  | 547,474         | 506,000        | 526,750       | 613,110          | 415,550       |             |
| Totals         | 979,098         | 935,000        | 972,826       | 1,081,379        | 778,350       |             |
| No. countries  | 61              | 65             | 51            | 63               | 34            |             |
| Africa         | 182,695         | 175,000        | 164,653       | 204,622          | 167,332       |             |
| Asia-Pacific   | 250,174         | 254,000        | 290,917       | 263,647          | 217,080       |             |
| Latin America  | 547,474         | 506,000        | 526,808       | 613,110          | 416,143       |             |
| Revised Totals | 980,343         | 935,000        | 982,377       | 1,081,379        | 800,555       |             |
| No. countries  | 63              | 65             | 63            | 63               | 63            |             |
| Source:        | 8               | 7              | 9             | 10               | 11            |             |
|                | FAOCB<br>1990   | FAOE<br>1990   | TREES<br>1990 | TREES<br>1997    | FAOE<br>2000  | GLC<br>2000 |
| Africa         | 186,983         | 373,015        | 198,000       | 193,000          | 407,033       | 228,489     |
| Asia-Pacific   | 233,091         | 266,366        | 283,000       | 270,000          | 219,538       | 237,032     |
| Latin America  | 715,411         | 870,510        | 669,000       | 653,000          | 799,550       | 657,577     |
| Totals         | 1,135,485       | 1,509,891      | 1,150,000     | 1,116,000        | 1,426,000     | 1,123,098   |
| No. countries  | 53              | 85             | 56            | 56               | 100           | 42          |
| Africa         | 187,074         | 311,426        | 199,112       | 194,078          | 339,777       | 228,601     |
| Asia-Pacific   | 237,561         | 258,251        | 281,852       | 268,586          | 210,871       | 261,082     |
| Latin America  | 754,970         | 864,088        | 671,331       | 655,275          | 796,141       | 690,800     |
| Revised Totals | 1,179,606       | 1,433,765      | 1,152,296     | 1,117,940        | 1,346,789     | 1,180,483   |
| No. countries  | 63              | 63             | 63            | 63               | 63            | 63          |
| Source:        | 3               | 3              | 12            | 12               | 4             | 14-17       |

<sup>1</sup>The set of 63 humid tropical countries was derived from Sommer's (ref. 7) set of 65 countries by adding Puerto Rico, and removing Argentina, Haiti and Paraguay, as they only have small areas of tropical moist forest and data were insufficient to quantify these (ref. 10). It includes:

Africa: Angola, Benin, Cameroon, Central African Republic, Congo, Congo (Zaire), Equatorial Guinea, Gabon, Ghana, Guinea, Guinea Bissau, Ivory Coast, Kenya, Liberia, Madagascar, Nigeria, Reunion, Senegal, Sierra Leone, Tanzania, Togo, Uganda

Asia-Pacific: Australia, Bangladesh, Brunei, Burma, Cambodia, Fiji, Hawaii, India, Indonesia, Laos, Malaysia, New Caledonia, Papua New Guinea, Philippines, Solomon Isles, Sri Lanka, Thailand, Vanuatu, Vietnam

Latin America and Caribbean: Belize, Bolivia, Brazil, Colombia, Costa Rica, Cuba, Dominican Republic, Ecuador, El Salvador, French Guiana, Guatemala, Guyana, Honduras, Jamaica, Mexico, Nicaragua, Panama, Peru, Puerto Rico, Suriname, Trinidad & Tobago, Venezuela
