# Supplementary material
Source: PubMed Central journal article supplement (PMC2206620)
Supplement: pnas_0703015105_5.pdf [file pnas_0703015105_5.pdf]

Table 8. Part of an area transition matrix for tropical land cover classes 1990-2000 (10<sup>6</sup> ha) based on a pantropical remote sensing survey

| Classes 2000:    | Closed forest | Long fallow | Short fallow | Other land cover | Total      |
|------------------|---------------|-------------|--------------|------------------|------------|
| Classes 1990:    |               |             |              |                  |            |
| Closed forest    | na            | na          | na           | 43.1             | na         |
| Long fallow      | na            | na          | na           | 4.7              | na         |
| Short fallow     | na            | na          | na           | 11.6             | na         |
| Other land cover | 0.6           | 0.5         | 4.9          | na               | <b>6.0</b> |
| Total            | na            | na          | na           | <b>59.4</b>      | na         |

NB. This matrix only shows deforestation (clearance that replaces forest or forest fallow by ‘Other land cover’) and its reverse, forest regeneration. Another study, for the humid tropics only and with different land cover classes, only puts annual regeneration at 5.4% of annual deforestation (12). na = not applicable

Source: (4)
