# Supplementary material
Source: PubMed Central journal article supplement (PMC2206620)
Supplement: pnas_0703015105_6.pdf [file pnas_0703015105_6.pdf]

Table 9. Tropical countries that according to Forest Resources Assessment 2005 have passed through their forest transitions, by showing a sustained rise in forest area 1990-2005 (10<sup>3</sup> ha)

|                                                              | <u>All Natural Forest</u> |        |        | <u>Natural Forest and Forest Plantations</u> |        |        |
|--------------------------------------------------------------|---------------------------|--------|--------|----------------------------------------------|--------|--------|
|                                                              | 1990                      | 2000   | 2005   | 1990                                         | 2000   | 2005   |
| Criterion: increase in Natural Forest alone                  |                           |        |        |                                              |        |        |
| Bhutan                                                       | 3,034                     | 3,140  | 3,193  | 3,035                                        | 3,141  | 3,195  |
| Cuba                                                         | 1,711                     | 2,093  | 2,319  | 2,058                                        | 2,435  | 2,713  |
| Gambia                                                       | 442                       | 461    | 471    | 442                                          | 461    | 471    |
| Puerto Rico                                                  | 404                       | 407    | 408    | 404                                          | 407    | 408    |
| St. Vincent                                                  | 9                         | 10     | 11     | 9                                            | 10     | 11     |
| Vietnam                                                      | 8,396                     | 9,675  | 10,236 | 9,363                                        | 11,725 | 12,931 |
| Criterion: increase in Natural Forest and Forest Plantations |                           |        |        |                                              |        |        |
| Cape Verde                                                   | 0                         | 0      | 0      | 58                                           | 82     | 84     |
| India                                                        | 61,985                    | 64,749 | 64,475 | 63,939                                       | 67,554 | 67,701 |
| Ivory Coast                                                  | 10,068                    | 10,067 | 10,068 | 10,222                                       | 10,328 | 10,405 |
| Rwanda                                                       | 70                        | 62     | 61     | 318                                          | 344    | 480    |

Source: (5)
